# Supplementary material for: Psychosocial impact of sickle cell disorder: perspectives from a Nigerian setting
Source: Springer Nature journal article supplement (doi:10.1186/1744-8603-6-2), 2010-01-01
Supplement: Additional file 1 [file 1744-8603-6-2-s1.doc]

# PSYCHOSOCIAL IMPACT OF SICKLE CELL DISEASE

**DEMOGRAPHICS:**

1. Gender

 Male  Female

2. What is your age? ………………………

3. What is your ethnic origin?

 Yoruba

 Igbo

 Hausa/Fulani

 Other

4. What is your current living status?

 Alone

 With spouse/ partner

 With parents

 With other relatives

 With unrelated persons

 Other

5. What is your current marital status?

 Never married

 Separated

 Widowed

 Divorced

 Married

6. What best describes your current main activity?

 In employment, or self-employed

 Retired

 Housework

 Student

 Seeking work

 Other, please specify………………….…………………………..

# PUBLIC ATTITUDES:

7. In general, do you feel that people see you in a negative way because of your sickle cell?

 Yes

 No

8. Have you ever felt that you have been treated unfairly or that your rights have been denied because of your sickle cell?

 Yes

 No

If ‘Yes’, how?

………………………………………………………………………………………………………………………………………………………………………………………………………………………………………………………………………

9. Have you ever experienced any negative attitudes due to any physical sickle cell complications you may have, for example, leg ulcers, or jaundice?

 Yes

 No

If ‘Yes’, please can you state what this physical complication was?

……………………………………………………………………………………………………………………………………………………………………………………………………………………………………………………………………....

10. Do you feel that there are more negative attitudes towards sickle cell because it largely affects black people?

 Yes

 No

11. Do you think that society has a negative image of sickle cell through its attitudes and perceptions?

 Yes

 No

12. Do you think that sickle cell disease as an illness is less known in society and needs more awareness?

 Yes

 No

13. If society was more aware of sickle cell disease, do you think that people would be more positive about sickle cell disease and those with sickle cell?

 Yes

 No

**EMPLOYMENT:**

14. Do you find it difficult to tell your employer(s) about your sickle cell?

 Yes

 No

If ‘Yes’, why is this?

 I feel my capabilities will be underestimated

 I fear that I will be viewed negatively

Other, please specify……………………………………………………...

………………………………………………………………………………

15. Have you ever lost your job due to absenteeism as a result of sickle cell crises?

 Yes

 No

16. Have you ever been rejected from a job application because of your sickle cell?

 Yes

 No

17. Have you ever experienced discrimination in the work place as a result of your sickle cell?

 Yes

 No

If ‘Yes’ how?

………………………………………………………………………………………………………………………………………………………………………………………………………………………………………………………………………

**EDUCATION:**

18. Have you ever felt isolated from your peers at school/college/university because of your sickle cell?

 Yes

 No

19. Have you ever suffered from teasing or bullying at school/college/university because of your sickle cell?

 Yes

 No

20. Do you think that teachers and other staff are aware and supportive of your sickle cell?

 Yes

 No

**HEALTH SERVICES:**

21. Do you feel that the medical staff mistrust you or dismiss your sickle cell pain?

 Yes, always

 Yes, sometimes

 No, never

22. Do you feel that you are labelled as a “drug seeker” or “drug addict” when seeking strong pain killers for your sickle pain?

 Yes, always

 Yes, sometimes

 No, never

23. Do you feel that the hospital has a good understanding of SCD and provides you with good individual care?

 Yes

 No

24. When you are hospitalised, do you feel that you are treated fairly by medical staff compared to other patients?

¨ Yes

¨ No

**PSYCHOLOGICAL ISSUES:**

25. Do you ever avoid situations where you may be viewed unfavourably because of your sickle cell?

¨ Yes

¨ No

26. Do you avoid telling new friends about your sickle cell?

¨ Yes

¨ No

If ‘Yes’, why is this?

¨ You’re worried about their reaction

¨ You think they may judge you in a negative way

¨ Other, please specify…………………………………………………..

……………………………………………………………………………

27. Do you find it difficult to keep relationships because of your sickle cell?

¨ Yes

¨ No

If ‘Yes’, why is this?

¨ Other people do not seem to understand the illness

¨ There are many complications of sickle cell that make it hard to keep friends

¨ Other, please specify…………………………………………………

28. Have you ever experienced any of the following negative feelings as a result of your sickle cell? (Please tick all that apply)

 Self-hate

 Depression

 Anxiety

THANK YOU FOR YOUR TIME
